The length of the fusion between leaflets in bicuspid aortic valve is independently related to ascending aorta dilation and flow dynamics alterations assessed by 4D-flow CMR

A. Guala<sup>1</sup>, A. Evangelista<sup>1</sup>, L. La Mura<sup>2</sup>, G. Teixido-Tura<sup>1</sup>, L. Dux-Santoy<sup>1</sup>, A. Ruiz-Munoz<sup>1</sup>, A. Cinque<sup>1</sup>, F. Valente<sup>1</sup>, A. Lopez Sainz<sup>1</sup>, L. Galian Gay<sup>1</sup>, L. Gutierrez<sup>1</sup>, T. Gonzalez Alujas<sup>1</sup>, A. Sao-Aviles<sup>1</sup>, I. Ferreira<sup>1</sup>, J.F. Rodriguez Palomares<sup>1</sup>

<sup>1</sup>University Hospital Vall d'Hebron, Department of Cardiology, Vall d'Hebron Research Institute, Universitat Autònoma de Barcelona, Barcelona, Spain; <sup>2</sup>Federico II University, Department of Advanced Biomedical Sciences, Napoli, Italy

**Funding Acknowledgement:** Type of funding source: Public grant(s) – National budget only. Main funding source(s): This study has been partially funded by Instituto Carlos III, Spanish Ministry of Science and Innovation (PI17/00381). Guala A. has received funding from the Spanish Ministry of Science, Innovation and Universities (IJC2018-037349-I).

**Background:** Aortic dilation in bicuspid aortic valve (BAV) patients has been related to altered flow patterns, which contribute to aortic wall degeneration. However, preventive aortic replacement is currently based on a diameter threshold. Several studies on excised BAV reported wide variability of fusion extent.

**Purpose:** To unveil whether leaflet fusion extent can be quantified by CMR and is related to aortic dilation and flow abnormalities in non-dysfunctional BAV.

**Methods:** One hundred and twenty adults with non-dysfunctional BAV and no previous aortic or aortic valve surgery and 28 healthy volunteers underwent double-oblique cine and 4D flow CMR. BAV patients with two sinuses of Valsalva or left and non-coronary cusps fusion were excluded. Peak systolic circumferential wall shear stress (WSSc) and pulse wave velocity (PWV) in the ascending aorta (AAo) were assessed by 4D flow CMR. Fu-

sion length between leaflets was measured using a stack of double-oblique cine CMR images of the aortic valve.

**Results:** The length of the fusion was effectively measured in 112/120 (93%) patients with good reproducibility (ICC = 0.826) and showed great variability (range 2.3–15.4 mm, 7.8±3.2 mm and tertiles cut-off points 6 and 9.3 mm). In multivariate analysis adjusted for clinical and demographic characteristics and PWV, fusion length was independently associated with the diameter at the sinus of Valsalva (p=0.002) and the AAo (p=0.02) (Table). WSSc progressively increased with larger fusion length (Figure), with statistical significance (p<0.05) in the right and outer regions of the proximal and mid AAo.

**Conclusions:** Bicuspid aortic leaflet fusion length varies considerably, and it is independently associated with AAo and aortic root dilation, possibly through flow alterations.

| Table 1. Multivariate analyses for aortic sinus and ascending aorta diameters |                                  |                         |
|-------------------------------------------------------------------------------|----------------------------------|-------------------------|
|                                                                               | Aortic sinus diameter<br>p-value | AAo diameter<br>p-value |
| Sex (% male)                                                                  | –                                | –                       |
| Age (years)                                                                   | 0.005                            | 0.001                   |
| Body surface area (m <sup>2</sup> )                                           | 0.003                            | –                       |
| Stroke volume (ml)                                                            | 0.014                            | 0.003                   |
| Systolic blood pressure (mmHg)                                                | –                                | –                       |
| Diastolic blood pressure (mmHg)                                               | –                                | –                       |
| AAo PWV (m/s)                                                                 | –                                | <0.001                  |
| Right-non coronary fusion BAV                                                 | 0.002                            | –                       |
| Fusion length (mm)                                                            | 0.002                            | 0.028                   |

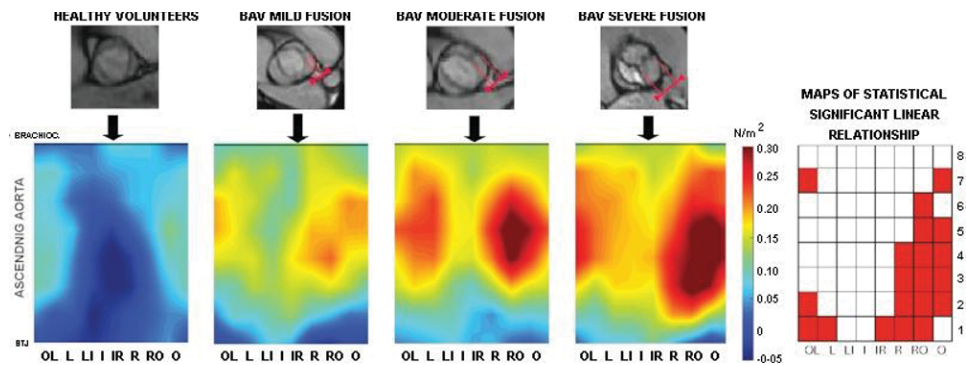

Figure 1. Maps of circumferential WSS
